# Supplementary material for: Relationship between the intermediate phases of the sputtered Zn(O,S) buffer layer and the conduction band offset in Cd-free Cu(In,Ga)Se2 solar cells
Source: Royal Society of Chemistry journal article supplement (doi:10.1039/d0ce00216j), 2020-01-01
Supplement: d0ce00216j1.pdf [file d0ce00216j1.pdf]

## Electronic Supplementary Information

### Relationship between the intermediate phases of sputtered Zn(O, S) buffer layer and the conduction band offset in Cd-free Cu(In,Ga)Se<sub>2</sub> solar cells

Qian Du<sup>a</sup>, Boyan Li<sup>b</sup>, Sihan Shi, Kaizhi Zhang, Yunxiang Zhang, Shiqing Cheng, Zhiqiang Zhou, Fangfang Liu, Shulong Sun<sup>c</sup>, Yun Sun, Wei Liu \*

*Qian Du and Boyan Li contributed equally.*

a Institute of Photoelectronic Thin Film Devices and Technology of Nankai University, Key Laboratory of Photoelectronic Thin Film Devices and Technology of Tianjin, Nankai University, Tianjin 300071, P. R. China.

b Institute of Modern Optics, College of Electronic Information and Optical Engineering, Nankai University, Tianjin 300350, China

c Hanergy Heyuan Mobile Energy Intelligence Manufacture Base, Beijing, 102211, China

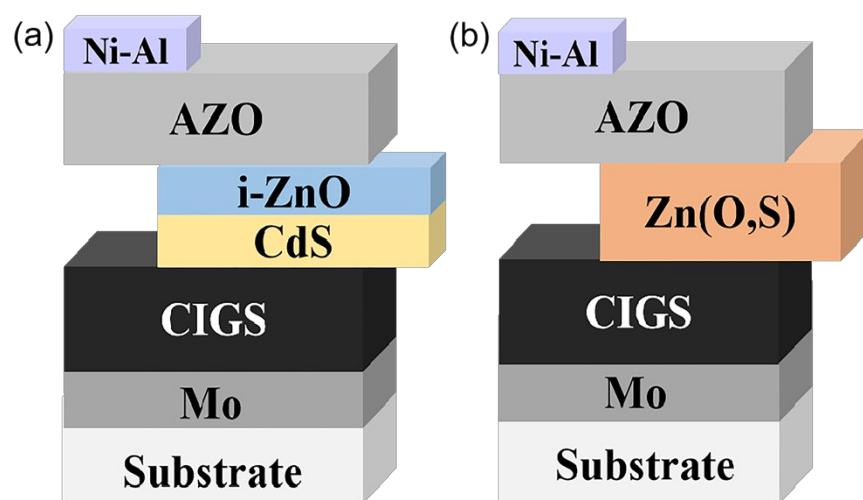

**Figure S1.** (a) The configurations of conventional CdS-based CIGS solar cells and (b) Zn(O,S)-based CIGS solar cells.

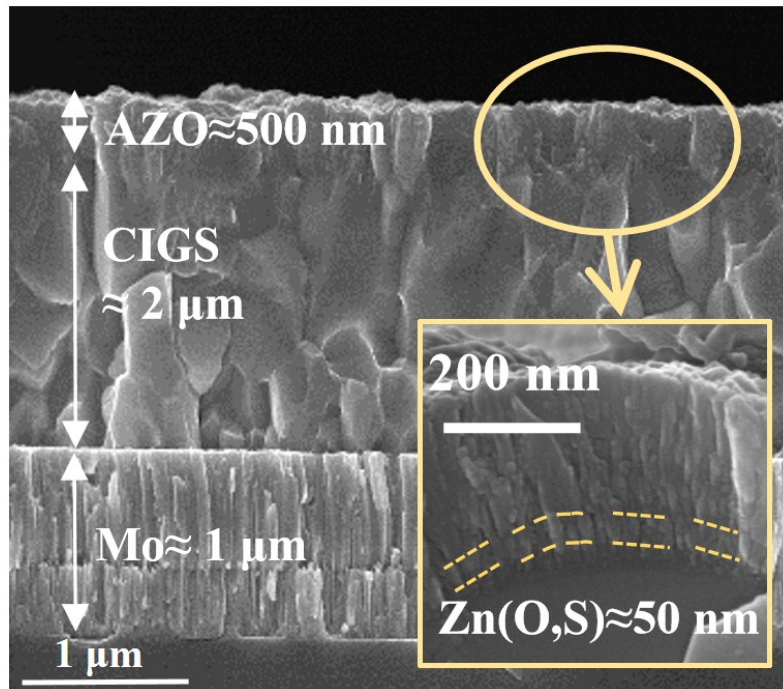

**Figure S2.** The configuration of cross-sectional SEM image of Zn(O,S)/CIGS heterojunction solar cells. The amplified part in the white circle is the Zn(O,S) buffer layer of 50 nm approximately.

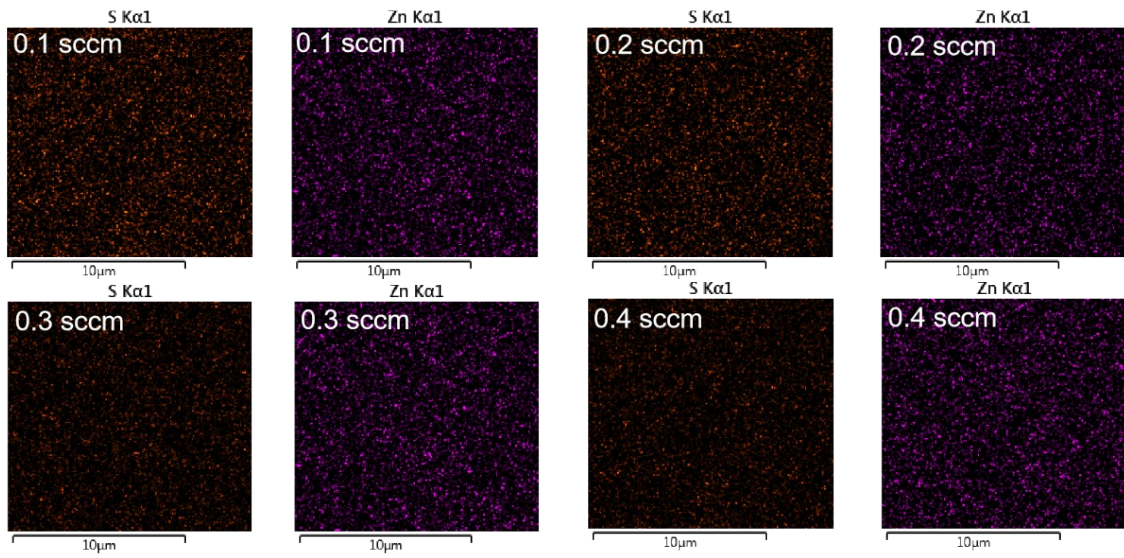

**Figure S3.** The EDS results of S and Zn elements distribution in the Zn(O,S) thin films with different oxygen fluxes (from 0.1 sccm to 0.4 sccm).

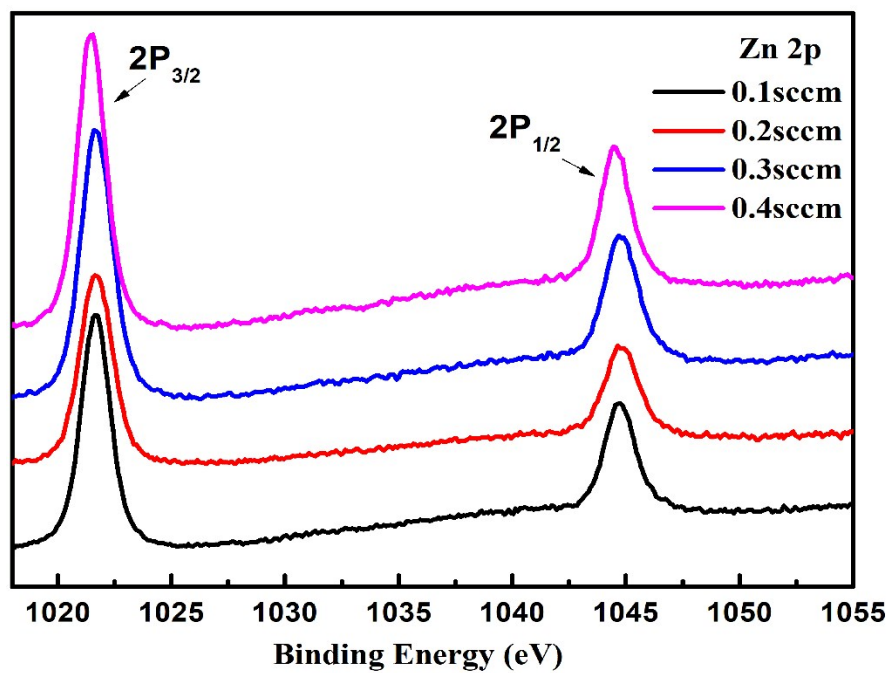

**Figure S4.** The XPS result of Zn 2p spectra in Zn(O,S) thin films with the various oxygen flux. The peak centered at 1022.3 eV is Zn  $2p_{3/2}$  and the peak positioned at 1044.9 eV is Zn  $2p_{1/2}$ .

**Table S1.** The variation of S content in Zn(O,S) thin films with the different oxygen fluxes based on XRF results.

| <b>Oxygen flux (sccm)</b>     | <b>0.1</b> | <b>0.2</b> | <b>0.3</b> | <b>0.4</b> | <b>0.5</b> | <b>0.6</b> |
|-------------------------------|------------|------------|------------|------------|------------|------------|
| S content based on XRF result | 0.58       | 0.54       | 0.28       | 0.27       | 0.27       | 0.26       |

**Table S2.** GIXRD Peak position of thin films under different oxygen fluxes based on XRD results.

| Oxygen flux<br>(sccm) | Crystal orientation $2\theta$ ( $^{\circ}$ ) |       |       |
|-----------------------|----------------------------------------------|-------|-------|
|                       | (100)                                        | (002) | (101) |
| 0.1                   | 30.33                                        | N/A   | N/A   |
| 0.2                   | 30.88                                        | N/A   | N/A   |
| 0.3                   | 31.17                                        | 33.36 | 35.47 |
| 0.4                   | 31.44                                        | 33.82 | 35.85 |

**Table S3.** The variation of S content in Zn(O,S) thin films with the different oxygen fluxes based on XRF and XPS results.

| <b>Oxygen flux (sccm)</b>     | <b>0.1</b> | <b>0.2</b> | <b>0.3</b> | <b>0.4</b> |
|-------------------------------|------------|------------|------------|------------|
| S content based on XRF result | 0.58       | 0.54       | 0.28       | 0.27       |
| S content based on XPS result | 0.63       | 0.57       | 0.28       | 0.23       |

**Table S4.** Peak area of O1s under the different oxygen fluxes

| <b>Oxygen flux (sccm)</b> | <b>Peak area</b> |            |            |
|---------------------------|------------------|------------|------------|
|                           | <b>O-A</b>       | <b>O-B</b> | <b>O-C</b> |
| 0.1                       | 4268.1           | 14094.9    | 7866.0     |
| 0.2                       | 4235.9           | 14302.6    | 6960.1     |
| 0.3                       | 4762.0           | 19674.6    | 9624.4     |
| 0.4                       | 4591.2           | 19820.6    | 10789.9    |



**Table S5.** The simulation parameters of the Zn(O,S)/CIGS solar cells

|                                       | <b>Al-ZnO</b>        | <b>CdS</b>           | <b>Zn(O,S)</b>       | <b>CIGS</b>          |
|---------------------------------------|----------------------|----------------------|----------------------|----------------------|
| Thickness (nm)                        | 350                  | 50                   | 50                   | ~2000                |
| Permittivity                          | 9                    | 10                   | 13.6                 | 13.6                 |
| Eg(eV)                                | 3.3                  | 2.4                  | variable             | variable             |
| Electron affinity                     | 4.6                  | 4.2                  | variable             | variable             |
| Nc (cm <sup>-3</sup> )                | 2.2×10 <sup>18</sup> | 2.2×10 <sup>18</sup> | 2.2×10 <sup>18</sup> | 2.2×10 <sup>18</sup> |
| Nv (cm <sup>-3</sup> )                | 1.8×10 <sup>19</sup> | 1.8×10 <sup>19</sup> | 1.8×10 <sup>19</sup> | 1.8×10 <sup>19</sup> |
| μ <sub>e</sub> (cm <sup>2</sup> /V*s) | 100                  | 100                  | 75                   | 40                   |
| μ <sub>h</sub> (cm <sup>2</sup> /V*s) | 30                   | 20                   | 20                   | 10                   |
| Nd (cm <sup>-3</sup> )                | 1.0×10 <sup>18</sup> | 1.0×10 <sup>18</sup> | 1.0×10 <sup>12</sup> | ~                    |
| Na (cm <sup>-3</sup> )                | ~                    | ~                    | ~                    | 2.0×10 <sup>16</sup> |

**Table S6.** Performance of Cu(In,Ga)Se<sub>2</sub> (CIGS) solar cells based on the samples with different oxygen fluxes and the samples with CdS buffer layer.

| Cells           | Cell number | V <sub>oc</sub> [mV] | J <sub>sc</sub> [mA cm <sup>-2</sup> ] | FF [%]       | Eff [%]      |
|-----------------|-------------|----------------------|----------------------------------------|--------------|--------------|
| <b>0.1 sccm</b> | <b>#1</b>   | <b>478</b>           | <b>27.13</b>                           | <b>41.32</b> | <b>5.4</b>   |
|                 | #2          | 430                  | 27.79                                  | 35.71        | 4.3          |
|                 | #3          | 490                  | 26.70                                  | 38.45        | 5.04         |
|                 | #4          | 484                  | 24.60                                  | 29.85        | 3.56         |
|                 | #5          | 482                  | 27.32                                  | 39.87        | 5.25         |
|                 | #6          | 476                  | 27.45                                  | 41.18        | 5.38         |
|                 | #7          | 473                  | 27.21                                  | 41.10        | 5.29         |
|                 | #8          | 489                  | 27.03                                  | 40.25        | 5.32         |
| <b>0.2 sccm</b> | <b>#1</b>   | <b>538</b>           | <b>34.04</b>                           | <b>59.43</b> | <b>10.89</b> |
|                 | #2          | 508                  | 28.8                                   | 66.95        | 9.8          |
|                 | #3          | 466                  | 28.5                                   | 55.74        | 7.39         |
|                 | #4          | 562                  | 26.18                                  | 61.09        | 8.9          |
|                 | #5          | 554                  | 32.31                                  | 58.78        | 10.52        |
|                 | #6          | 539                  | 33.94                                  | 56.52        | 10.34        |
|                 | #7          | 542                  | 28.57                                  | 56.77        | 8.79         |
|                 | #8          | 546                  | 30.92                                  | 58.40        | 9.86         |
| <b>0.3 sccm</b> | <b>#1</b>   | <b>592</b>           | <b>31.63</b>                           | <b>71.24</b> | <b>13.34</b> |
|                 | #2          | 580                  | 32.7                                   | 70.12        | 13.3         |
|                 | #3          | 556                  | 33.53                                  | 69.66        | 12.99        |
|                 | #4          | 538                  | 32.57                                  | 65.83        | 11.53        |
|                 | #5          | 584                  | 32.32                                  | 70.20        | 13.25        |
|                 | #6          | 581                  | 32.69                                  | 69.03        | 13.11        |
|                 | #7          | 569                  | 33.41                                  | 67.72        | 12.87        |
|                 | #8          | 552                  | 31.55                                  | 65.98        | 11.49        |
| <b>0.4 sccm</b> | <b>#1</b>   | <b>574</b>           | <b>25.11</b>                           | <b>66.11</b> | <b>9.54</b>  |
|                 | #2          | 512                  | 29.34                                  | 57.58        | 8.65         |
|                 | #3          | 550                  | 26.03                                  | 51.93        | 7.43         |

|                 |           |            |              |              |             |
|-----------------|-----------|------------|--------------|--------------|-------------|
|                 | #4        | 557        | 28.43        | 59.42        | 9.41        |
|                 | #5        | 542        | 28.69        | 57.36        | 8.92        |
|                 | #6        | 554        | 27.64        | 61.78        | 9.46        |
|                 | #7        | 561        | 29.11        | 57.20        | 9.34        |
|                 | #8        | 549        | 28.34        | 54.77        | 8.52        |
| <b>CdS/CIGS</b> | <b>#1</b> | <b>616</b> | <b>30.73</b> | <b>76.06</b> | <b>14.4</b> |
|                 | #2        | 658        | 32.16        | 67.06        | 14.19       |
|                 | #3        | 634        | 29.18        | 69.99        | 12.95       |
|                 | #4        | 640        | 29.96        | 69.83        | 13.39       |
|                 | #5        | 647        | 30.55        | 72.15        | 14.26       |
|                 | #6        | 635        | 31.67        | 68.97        | 13.87       |
|                 | #7        | 638        | 32.15        | 66.74        | 13.69       |
|                 | #8        | 641        | 30.76        | 72.22        | 14.24       |

**Table S7.** Performance of Cu(In,Ga)Se<sub>2</sub> (CIGS) solar cells based on the samples with different oxygen fluxes and the samples with CdS buffer layer after a half year.

| <b>Cells</b>    | <b>Cell number</b> | <b>Voc [mV]</b> | <b>Jsc [mA cm<sup>-2</sup>]</b> | <b>FF [%]</b> | <b>Eff [%]</b> |
|-----------------|--------------------|-----------------|---------------------------------|---------------|----------------|
| <b>0.1 sccm</b> | #1                 | 477             | 26.52                           | 41.15         | 5.21           |
|                 | #2                 | 428             | 27.82                           | 35.43         | 4.22           |
|                 | #3                 | 491             | 26.54                           | 38.79         | 5.05           |
|                 | #4                 | 480             | 24.48                           | 29.39         | 3.42           |
|                 | #5                 | 482             | 27.17                           | 39.56         | 5.18           |
|                 | #6                 | 477             | 26.98                           | 41.01         | 5.28           |
|                 | #7                 | 471             | 27.19                           | 39.86         | 5.14           |
|                 | #8                 | 483             | 26.75                           | 40.17         | 5.20           |
| <b>0.2 sccm</b> | #1                 | 539             | 33.91                           | 59.22         | 10.82          |
|                 | #2                 | 501             | 28.81                           | 66.24         | 9.56           |
|                 | #3                 | 465             | 28.34                           | 55.12         | 7.26           |
|                 | #4                 | 557             | 25.96                           | 60.74         | 8.78           |
|                 | #5                 | 546             | 31.99                           | 57.32         | 10.01          |
|                 | #6                 | 528             | 33.67                           | 56.66         | 10.07          |
|                 | #7                 | 543             | 27.74                           | 54.57         | 8.22           |
|                 | #8                 | 546             | 30.12                           | 58.23         | 9.58           |
| <b>0.3 sccm</b> | #1                 | 590             | 31.52                           | 70.83         | 13.17          |
|                 | #2                 | 572             | 32.25                           | 69.34         | 12.79          |
|                 | #3                 | 554             | 33.29                           | 69.47         | 12.81          |
|                 | #4                 | 529             | 32.33                           | 65.26         | 11.16          |
|                 | #5                 | 585             | 32.24                           | 70.03         | 13.21          |
|                 | #6                 | 580             | 32.42                           | 68.69         | 12.92          |
|                 | #7                 | 562             | 32.89                           | 67.36         | 12.45          |
|                 | #8                 | 548             | 30.74                           | 65.21         | 10.98          |
| <b>0.4 sccm</b> | #1                 | 573             | 25.12                           | 66.08         | 9.51           |
|                 | #2                 | 510             | 29.25                           | 57.46         | 8.57           |
|                 | #3                 | 543             | 25.58                           | 50.69         | 7.04           |

|                 |    |     |       |       |       |
|-----------------|----|-----|-------|-------|-------|
|                 | #4 | 557 | 28.38 | 59.25 | 9.37  |
|                 | #5 | 541 | 28.43 | 56.99 | 8.77  |
|                 | #6 | 555 | 27.63 | 61.74 | 9.47  |
|                 | #7 | 559 | 29.10 | 57.12 | 9.29  |
|                 | #8 | 547 | 28.19 | 54.53 | 8.41  |
| <b>CdS/CIGS</b> | #1 | 612 | 30.37 | 75.98 | 14.12 |
|                 | #2 | 658 | 32.09 | 66.84 | 14.11 |
|                 | #3 | 630 | 29.17 | 69.75 | 12.82 |
|                 | #4 | 640 | 29.81 | 69.48 | 13.26 |
|                 | #5 | 644 | 30.13 | 71.87 | 13.95 |
|                 | #6 | 631 | 31.55 | 68.62 | 13.66 |
|                 | #7 | 638 | 32.14 | 66.75 | 13.69 |
|                 | #8 | 642 | 30.58 | 72.19 | 14.17 |
